# Supplementary material
Source: Royal Society of Chemistry journal article supplement (doi:10.1039/d5cp04857e)
Supplement: d5cp04857e1.pdf [file d5cp04857e1.pdf]

## Electronic Supplementary Information

S Santhoshkumar,<sup>1</sup> Yan-Ru Liu<sup>1</sup>, and Wei-Lung Tseng\*<sup>1,2</sup>

<sup>1</sup>Department of Chemistry, National Sun Yat-sen University, No. 70 Lienhai Rd.,  
Kaohsiung, 80424, Taiwan

<sup>2</sup>School of Pharmacy, College of Pharmacy, Kaohsiung Medical University, No.100,  
Shiquan 1st Rd., 80708, Kaohsiung, Taiwan

Correspondence: Dr. Wei-Lung Tseng

E-mail: [tsengwl@mail.nsysu.edu.tw](mailto:tsengwl@mail.nsysu.edu.tw)

Fax: 011-886-7-5254644

## Experimental Section

**Determination of luminescence QY.** The luminescence QYs of LYZ-stabilized Au<sub>8</sub> and Au<sub>25</sub> clusters were determined using quinine sulfate (QY = 0.54 in 0.1 M H<sub>2</sub>SO<sub>4</sub>) and BSA-stabilized AuNCs (QY = 0.06) as reference standards. Absorbance was adjusted to 0.01–0.05 (intervals of 0.01), and QYs were calculated according to the following equation:

$$Q = Q_R \frac{m}{m_R} \cdot \frac{n^2}{n_R^2}$$

Herein,  $Q$  is the quantum yield of the sample,  $Q_R$  is the quantum yield of the reference,  $m$  and  $m_R$  are the slopes of the integrated fluorescence intensity versus absorbance plots for the sample and reference, respectively, and  $n$  and  $n_R$  are the refractive indices of the solvents (with water at room temperature taken as 1.333).

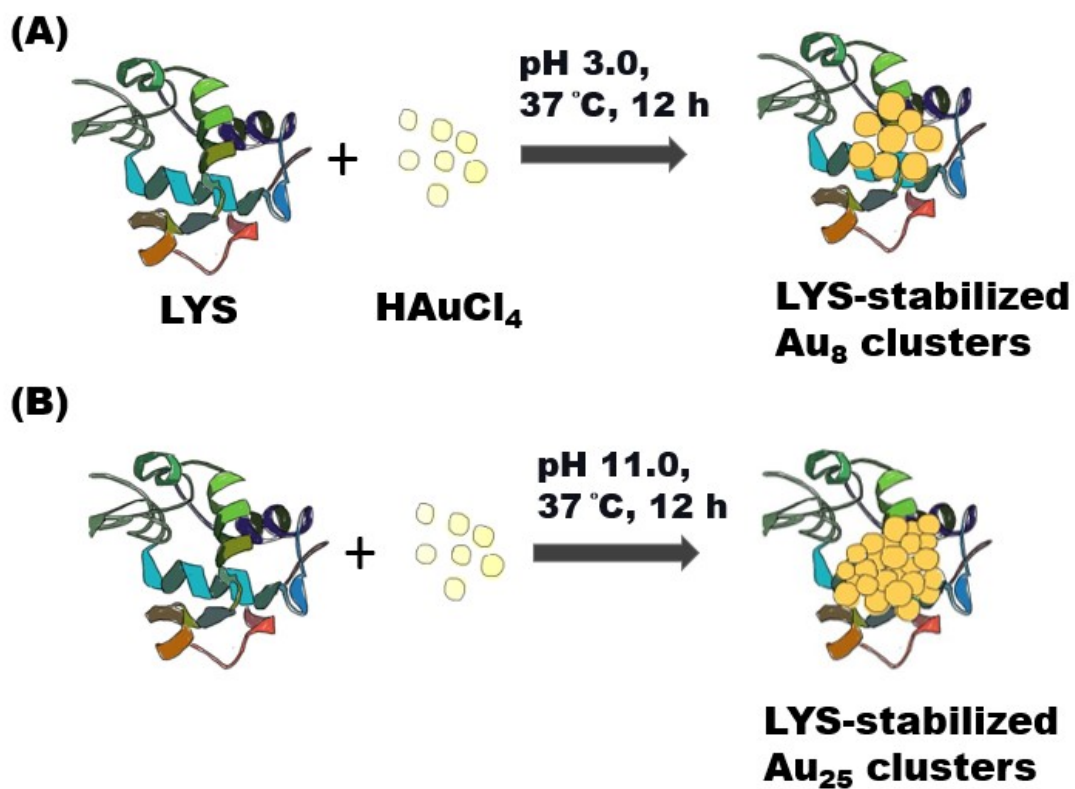

**Figure S1.** Schematic illustration associated with the preparation of (A) Lys-stabilized Au<sub>8</sub> clusters and (B) Lys-stabilized Au<sub>25</sub> clusters. Both reactions were conducted at 37 °C in the dark and purified by dialysis (MWCO 1000 Da).

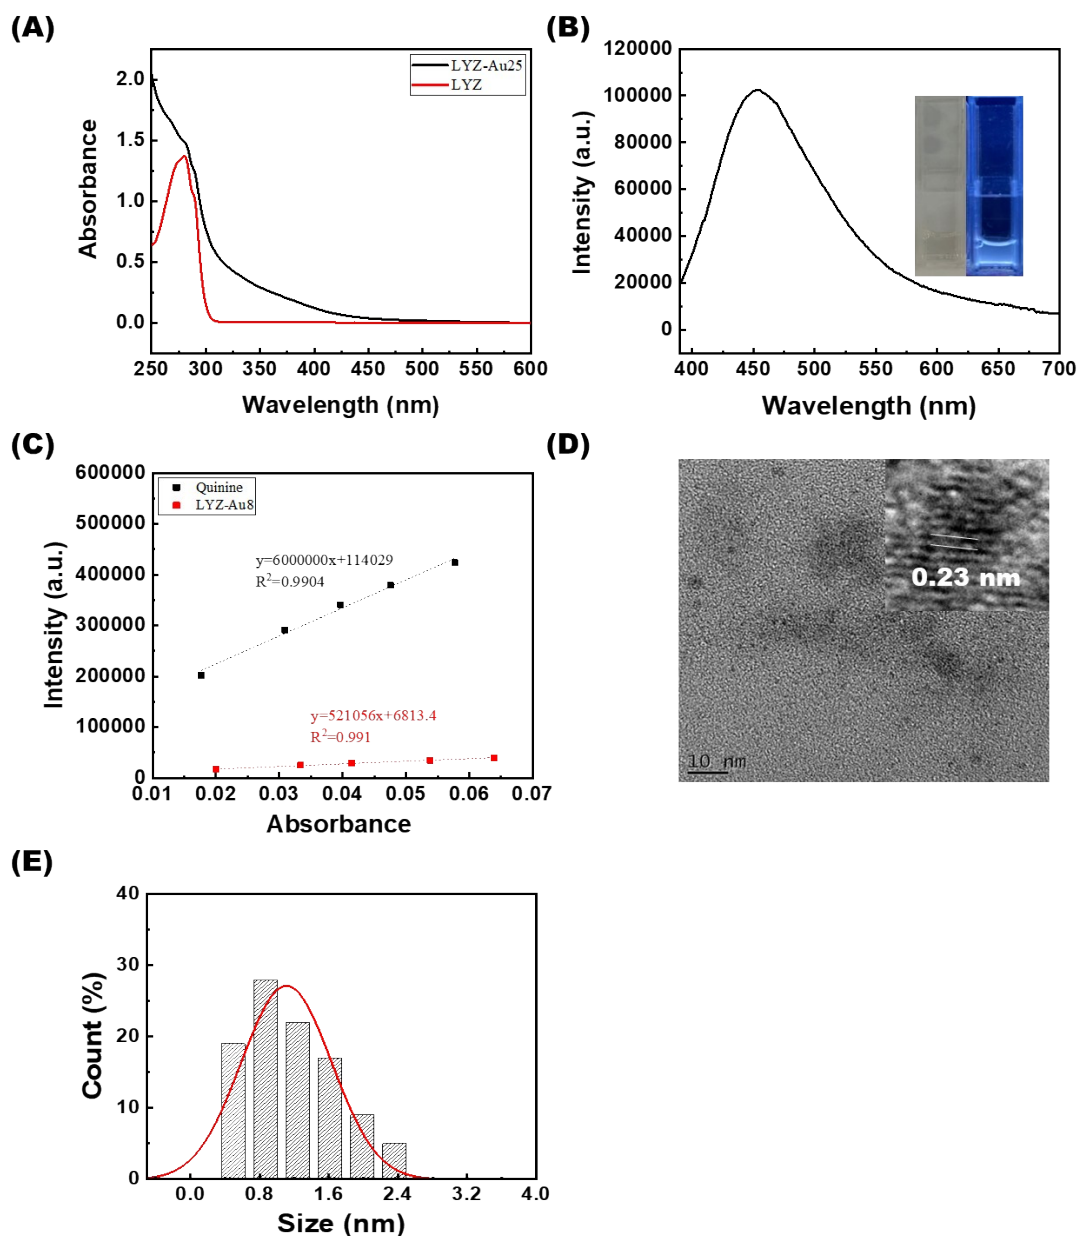

**Figure S2.** Optical and morphological characterization of LYZ-stabilized Au<sub>8</sub> clusters. (A) UV-vis absorption spectra of native LYZ (red) and LYZ-stabilized Au<sub>8</sub> clusters (black). (B) Photographs of LYZ-stabilized Au<sub>8</sub> clusters under daylight (left) and UV illumination (right) and their emission spectrum. (C) Plot of integrated emission intensity as a function of absorbance for the reference quinine sulfate (black) and the LYZ-stabilized Au<sub>8</sub> clusters (red). The slopes of the linear fits were used to calculate the QY. (D, E) TEM images and particle size distribution of Au<sub>8</sub> clusters ( $1.4 \pm 0.5$  nm,  $n = 100$ ). The inset shows lattice fringes consistent with the Au(111) plane.

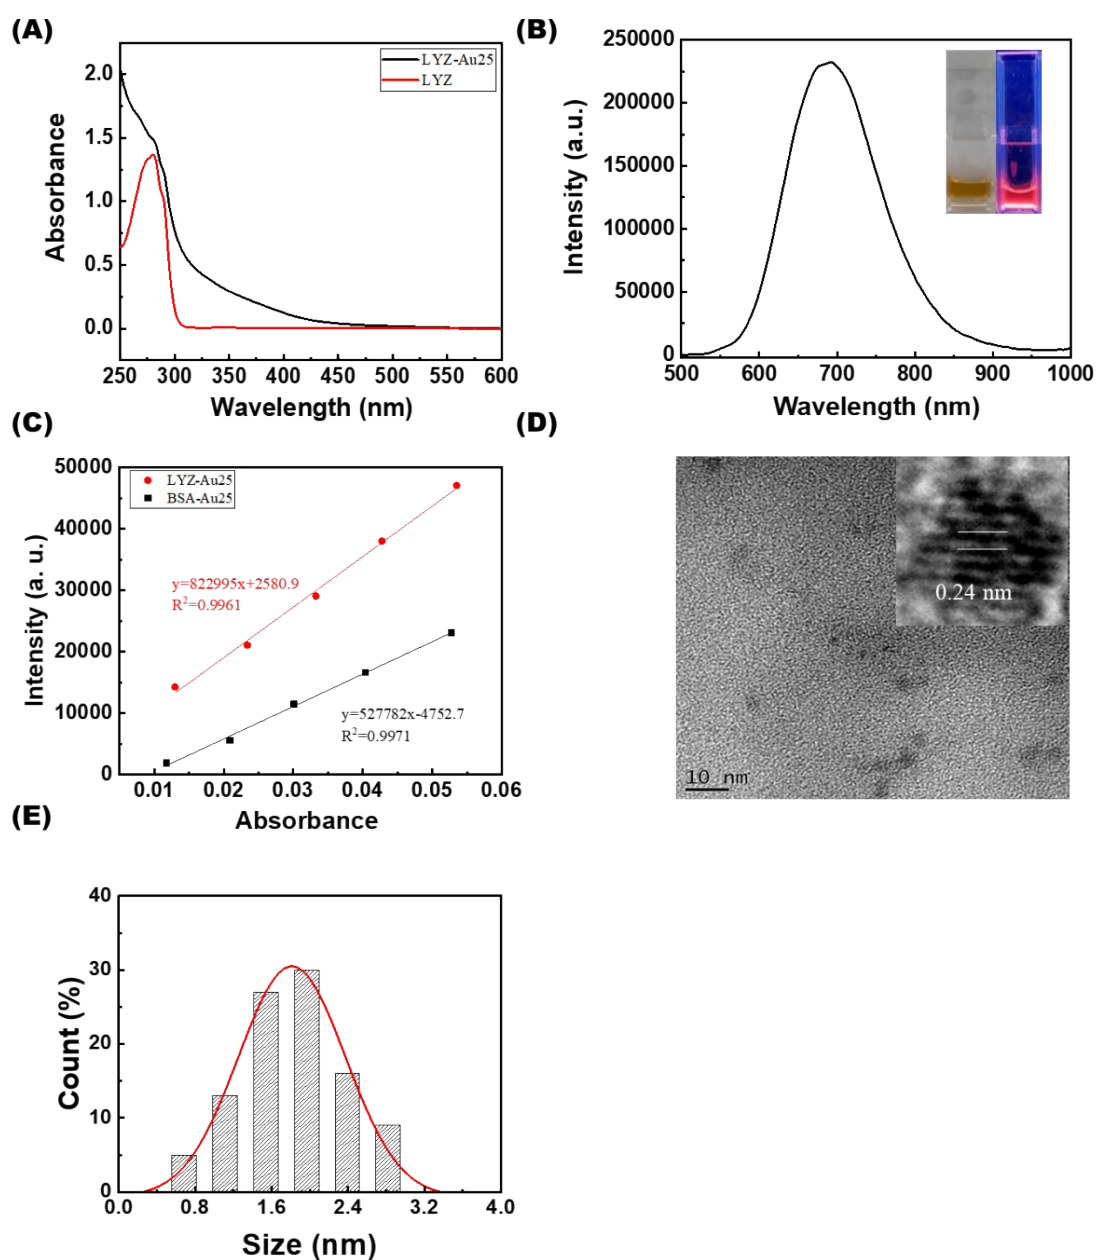

**Figure S3.** Optical and morphological characterization of LYZ-stabilized Au<sub>25</sub> clusters. (A) UV-vis absorption spectra of native LYZ (red) and LYZ-stabilized Au<sub>25</sub> clusters (black). (B) Photographs of LYZ-stabilized Au<sub>25</sub> clusters under daylight (left) and UV illumination (right) and their emission spectrum. (C) Plot of integrated emission intensity as a function of absorbance for the reference BSA-stabilized Au<sub>25</sub> clusters (black) and the LYZ-stabilized Au<sub>25</sub> clusters (red). The slopes of the linear fits were used to calculate the QY. (D, E) TEM images and particle size distribution of Au<sub>25</sub> clusters ( $1.5 \pm 0.4$  nm,  $n = 100$ ). The inset shows lattice fringes consistent with the Au(111) plane.

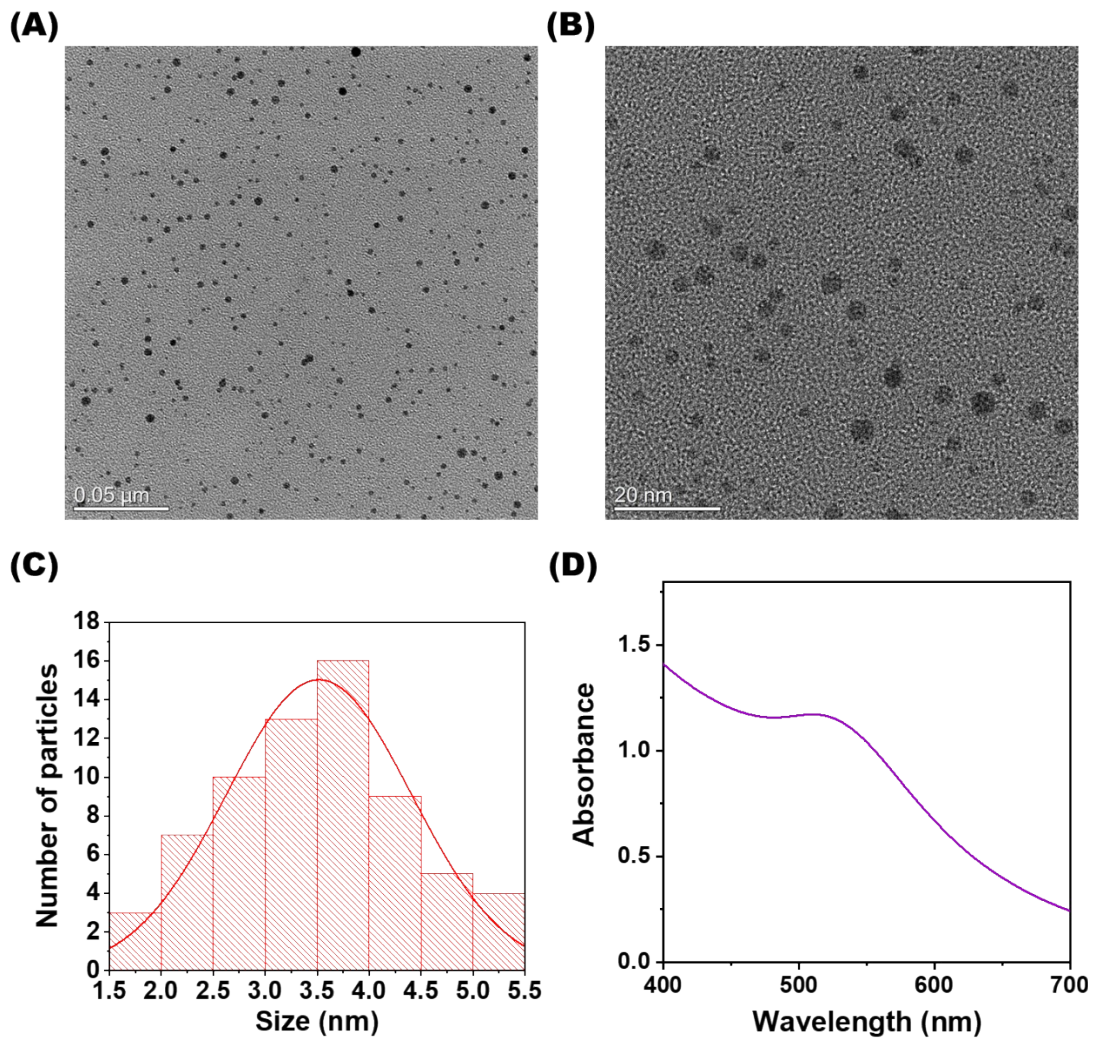

**Figure S4.** TEM characterization and optical signature of LYZ-stabilized AuNPs (~3.2 nm) clusters. (A, B) TEM images of AuNPs at different magnification. (C) Particle size distribution ( $3.2 \pm 0.5$  nm,  $n = 100$ ) of LYZ-stabilized AuNPs (D) UV-vis absorption spectrum of LYZ-stabilized AuNPs.

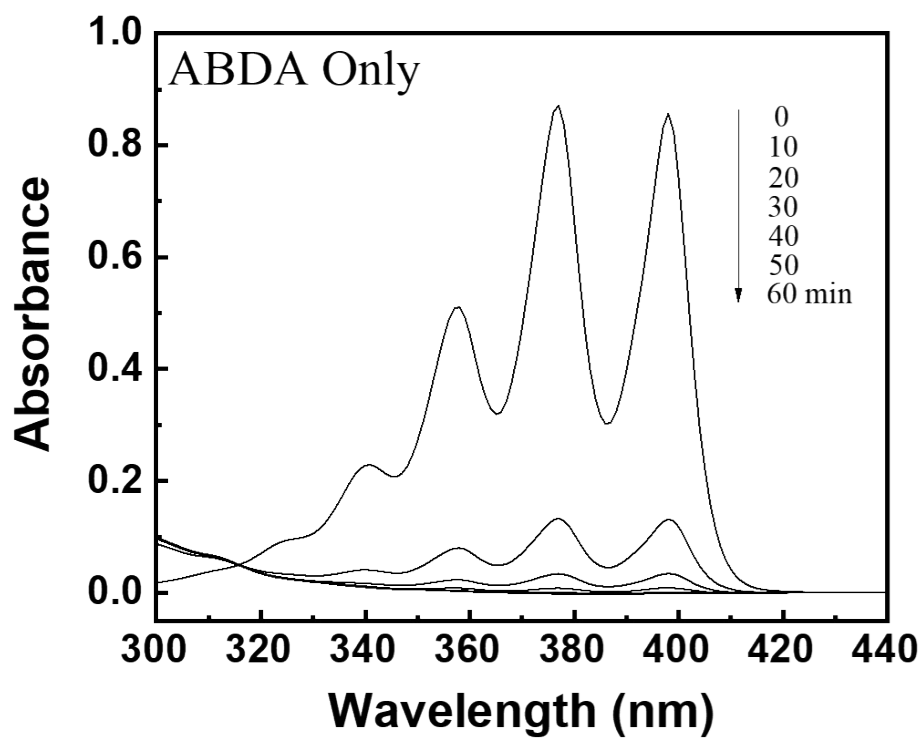

**Figure S5.** Time-dependent absorption spectra of ABDA-only solution under violet LED (400–420 nm).

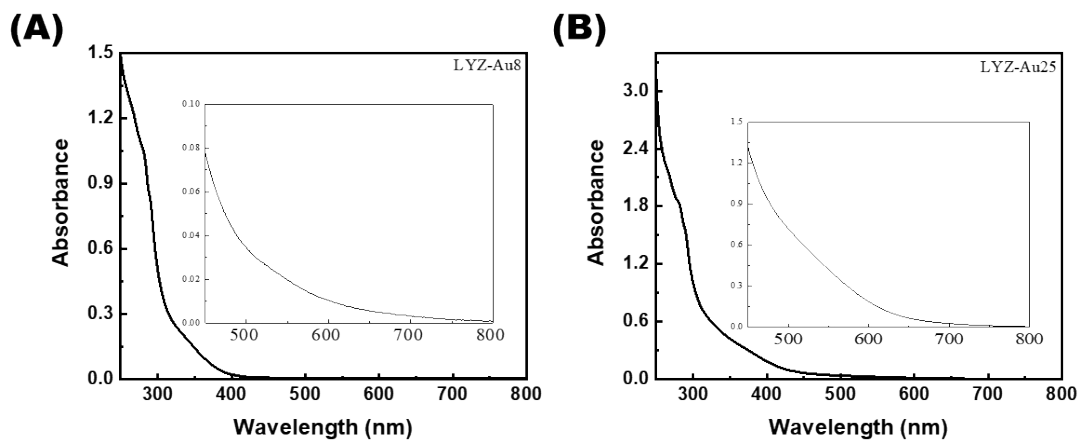

**Figure S6.** UV-vis absorption spectra of lysozyme-stabilized (A) Au<sub>8</sub> and (B) Au<sub>25</sub> clusters. The main panel displays the full absorption profiles of both clusters, while the inset shows an enlarged view of the low-wavelength region to highlight the characteristic absorption features of Au<sub>8</sub> and Au<sub>25</sub>.

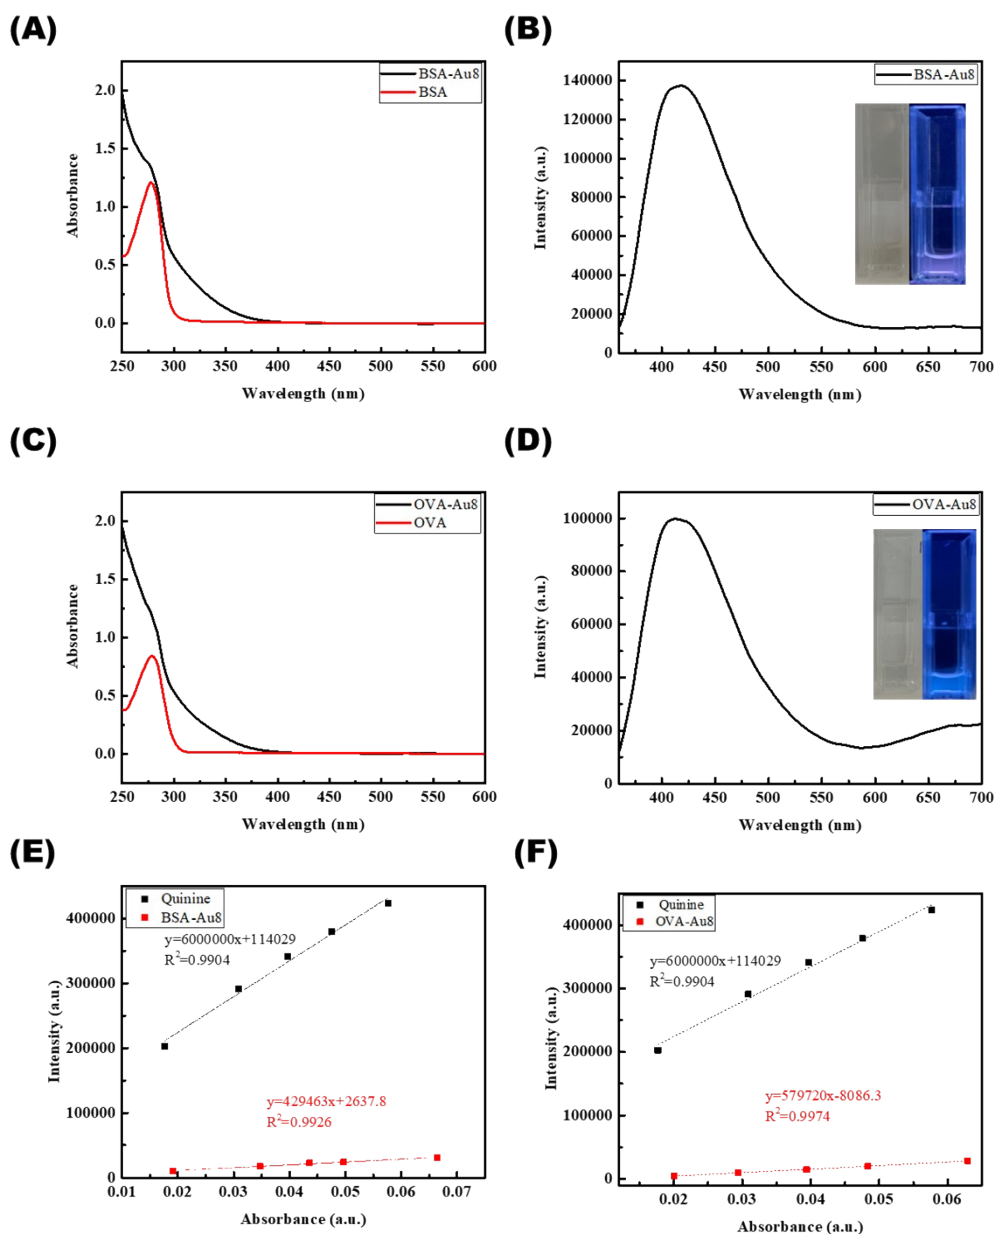

**Figure S7.** Optical features of BSA- and ovalbumin-stabilized Au<sub>8</sub> clusters. (A) UV-vis absorption spectra of native BSA (red) and BSA-stabilized Au<sub>8</sub> clusters (black). (B) Photographs of BSA-stabilized Au<sub>8</sub> clusters under daylight (left) and UV illumination (right) and their emission spectrum. (C) UV-vis absorption spectra of native ovalbumin (red) and ovalbumin-stabilized Au<sub>8</sub> clusters (black). (D) Photographs of ovalbumin-stabilized Au<sub>8</sub> clusters under daylight (left) and UV illumination (right) and their emission spectrum. (E, F) Plot of the absorbance versus integrated emission intensity for (E) BSA-stabilized Au<sub>8</sub> clusters (red) and reference quinine sulfate (black) and (F) ovalbumin-stabilized Au<sub>8</sub> clusters and reference quinine sulfate (black)

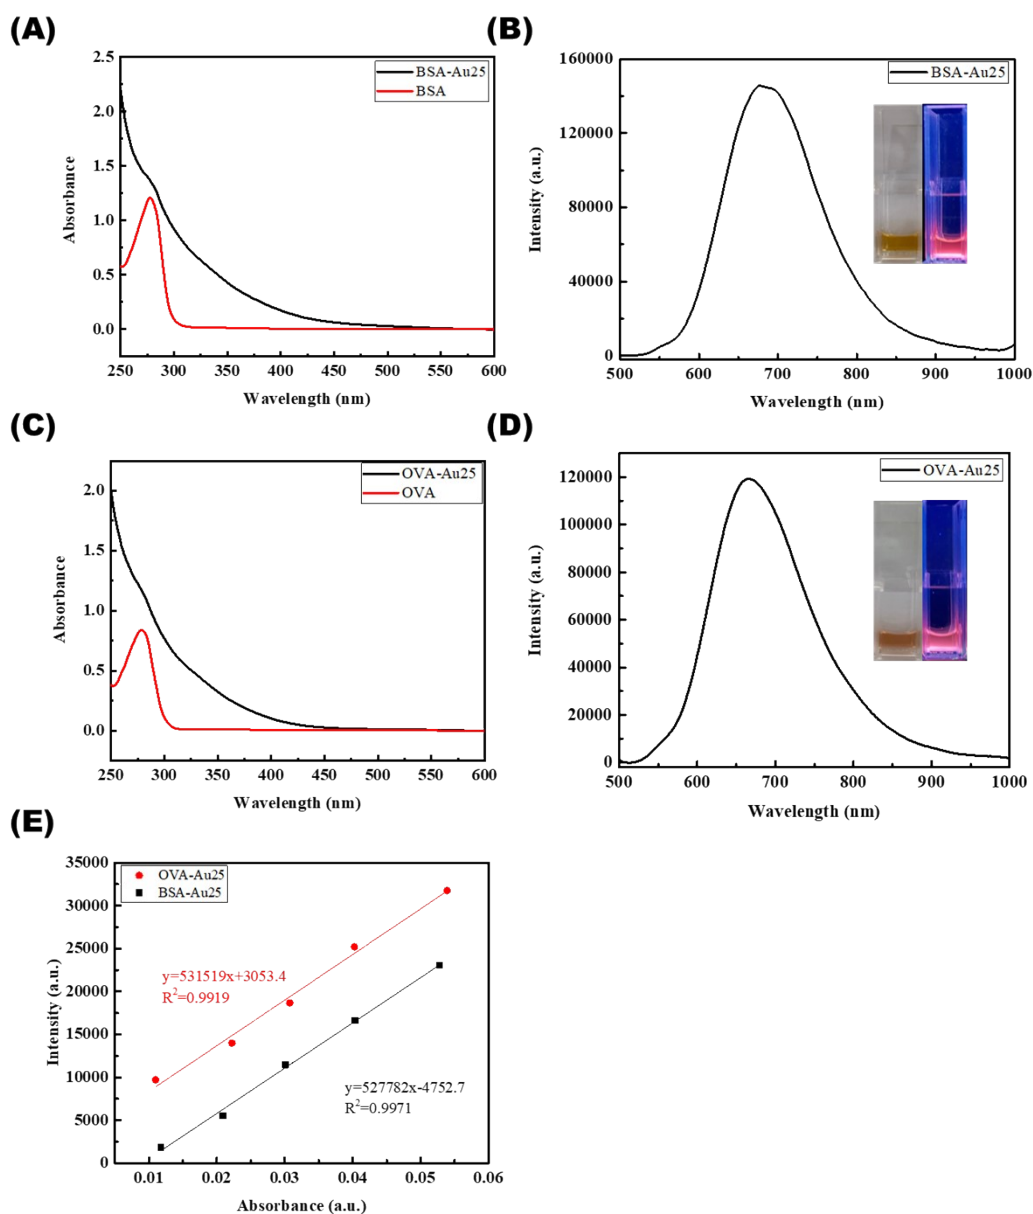

**Figure S8.** Optical features of BSA- and ovalbumin-stabilized Au<sub>25</sub> clusters. (A) UV-vis absorption spectra of native BSA (red) and BSA-stabilized Au<sub>25</sub> clusters (black). (B) Photographs of BSA-stabilized Au<sub>25</sub> clusters under daylight (left) and UV illumination (right) and their emission spectrum. (C) UV-vis absorption spectra of native ovalbumin (red) and ovalbumin-stabilized Au<sub>25</sub> clusters (black). (D) Photographs of ovalbumin-stabilized Au<sub>25</sub> clusters under daylight (left) and UV illumination (right) and their emission spectrum. (E) Plot of the absorbance versus integrated emission intensity for reference BSA-stabilized Au<sub>25</sub> clusters (black) and ovalbumin-stabilized Au<sub>25</sub> clusters (red).

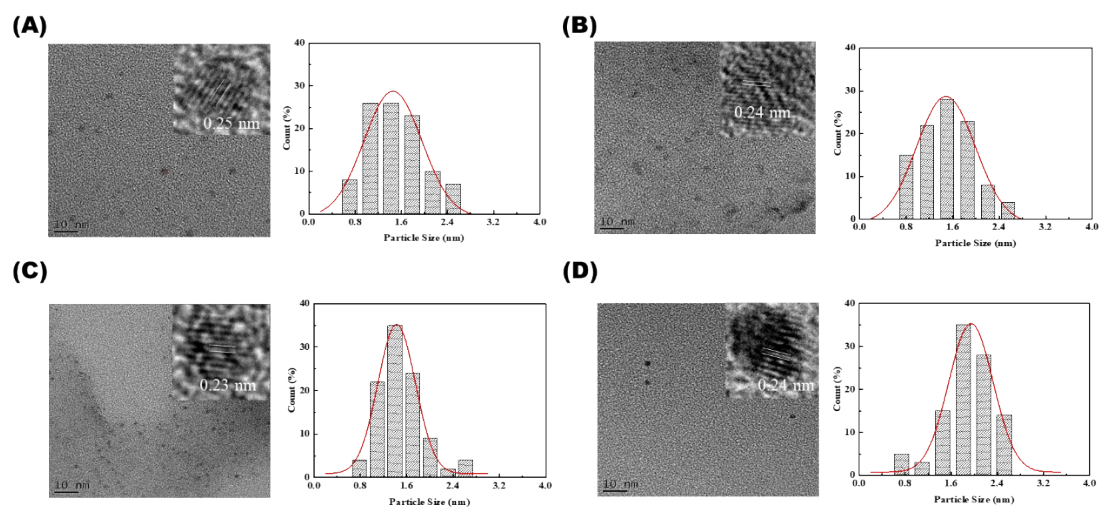

**Figure S9.** TEM images (left) and particle size distribution (right) of (A) BSA-stabilized Au<sub>8</sub> clusters, (B) ovalbumin-stabilized Au<sub>8</sub> clusters, (C) BSA-stabilized Au<sub>25</sub> clusters, and (D) ovalbumin-stabilized Au<sub>25</sub> clusters. (A–D) The inset shows lattice fringes consistent with the Au(111) plane.

**Table S1.** Properties and Literature of Au<sub>8</sub> clusters

| <b>Capping Ligands</b>                | <b>Excitation (nm)</b> | <b>Emission (nm)</b> | <b>XPS Au(0):Au(I)</b>                  | <b>How Determined to be Au<sub>8</sub> Clusters</b>                     | <b>Ref.</b> |
|---------------------------------------|------------------------|----------------------|-----------------------------------------|-------------------------------------------------------------------------|-------------|
| Pepsin                                | 330                    | 480                  | Only Au(0) detected                     | MALDI-TOF MS; spherical Jellium model                                   | <i>1</i>    |
| Lysozyme Type VI                      | 380                    | 455                  | Only Au(0) detected                     | MALDI-TOF MS; spherical Jellium model                                   | <i>2</i>    |
| Dodecylamine & DMAET <sup>a</sup>     | 360                    | 436                  | Not available                           | MALDI-TOF MS; optical spectroscopy                                      | <i>3</i>    |
| PAMAM Dendrimers (G4OH)               | 387                    | 458                  | Not available                           | Spherical Jellium model; literature comparison                          | <i>4</i>    |
| PAMAM Dendrimers (G4NH <sub>2</sub> ) | 390                    | 460                  | Not available                           | Spherical Jellium model;                                                | <i>5</i>    |
| DNase 1                               | 395                    | 460                  | Not available                           | Literature comparison                                                   | <i>6</i>    |
| Polyethylenimine                      | 353                    | 445                  | Only Au(0) detected                     | ESI Mass Spectrometry; similarity to PAMAM-encapsulated Au <sub>8</sub> | <i>7</i>    |
| Bovine Serum Albumin                  | 370                    | 450                  | Only Au(0) detected                     | Spherical Jellium model; literature comparison                          | <i>8</i>    |
| Human Hemoglobin                      | 365                    | 450                  | Do not specify an exact numerical ratio | Literature comparison                                                   | <i>9</i>    |
| Peptide 1 & 3-MPA <sup>b</sup>        | 360                    | 455                  | 95 : 5                                  | MALDI-TOF MS ; spherical Jellium model                                  | <i>10</i>   |
| MPT63 proteins                        | 385                    | 445                  | 81:19                                   | MALDI-TOF MS; spherical Jellium model                                   | <i>11</i>   |

|                                        |     |     |              |                                                                      |                  |
|----------------------------------------|-----|-----|--------------|----------------------------------------------------------------------|------------------|
| Gly20Cys/Gly40Cys Mutants <sup>c</sup> |     |     |              |                                                                      |                  |
| Lysozyme                               | 370 | 454 | Not detected | Spherical Jellium model; optical spectroscopy; literature comparison | <i>This work</i> |
| Ovalbumin                              | 370 | 415 | Not detected | Spherical Jellium model; optical spectroscopy; literature comparison | <i>This work</i> |
| Bovine serum albumin                   | 370 | 429 | Not detected | Spherical Jellium model; optical spectroscopy; literature comparison | <i>This work</i> |

<sup>a</sup>2-(dimethylamino) ethanethiol; <sup>b</sup>3-mercaptopropionic acid; <sup>c</sup>A version of the protein where the glycine residues at position 20 and 40 have been replaced with cysteine.

**Table S2.** Properties and Literature of Au<sub>25</sub> clusters

| <b>Capping Ligands</b>                                   | <b>Excitation (nm)</b> | <b>Emission (nm)</b> | <b>XPS Au(0):Au(I)</b> | <b>How Determined to be Au<sub>8</sub> Clusters</b>                           | <b>Ref.</b>   |
|----------------------------------------------------------|------------------------|----------------------|------------------------|-------------------------------------------------------------------------------|---------------|
| Pepsin                                                   | 360                    | 670                  | Only Au(0) detected    | MALDI-TOF MS; spherical Jellium model                                         | <sup>1</sup>  |
| Lysozyme Type VI                                         | 380                    | 635                  | Only Au(0) detected    | MALDI-TOF MS; spherical Jellium model                                         | <sup>2</sup>  |
| glutathione (GSH) and 3-mercaptopropionic acid (MPA)     | -                      | -                    | Only Au(0) detected    | UV-vis and ESI-MS                                                             | <sup>12</sup> |
| Bovine serum albumin (BSA)                               | 370; 530               | 685                  | Au(0) only             | Spherical Jellium model; literature comparison MALDI-TOF MS; XPS measurements | <sup>8</sup>  |
| BSA                                                      | 470                    | 640                  | Au(0) and Au(I)        | MALDI-TOF MS; XPS measurements; literature comparison                         | <sup>13</sup> |
| Native bovine lactoferrin                                | 445                    | 650                  | Only Au(0) detected    | MALDI-TOF-MS; XPS measurements                                                | <sup>14</sup> |
| Captopril (Capt)                                         | 514                    | 670                  |                        | ESI-MS; MALDI-MS                                                              | <sup>15</sup> |
| DNase 1                                                  | 460                    | 640                  | Not available          | Literature comparison                                                         | <sup>6</sup>  |
| Sodium 3-(triphenylphosphonio)propane-1-thiolate bromide | 488                    | 670                  | Au(0) and Au(I)        | ESI-TOF-MS                                                                    | <sup>16</sup> |
| GSH, N-acetyl-l-                                         | -                      | -                    | Not detected           | ESI MS; literature comparison                                                 | <sup>17</sup> |

|                                                      |     |         |              |                                             |                  |
|------------------------------------------------------|-----|---------|--------------|---------------------------------------------|------------------|
| cysteine (AcCys), Capt), and 4-mercapto benzoic acid |     |         |              |                                             |                  |
| Lysozyme                                             | 370 | 680-700 | Not detected | Optical spectroscopy; literature comparison | <i>This work</i> |
| Ovalbumin                                            | 370 | 680-700 | Not detected | Optical spectroscopy; literature comparison | <i>This work</i> |
| BSA                                                  | 370 | 680-700 | Not detected | Optical spectroscopy; literature comparison | <i>This work</i> |

## References

1. H. Kawasaki, K. Hamaguchi, I. Osaka and R. Arakawa, *Advanced Functional Materials*, 2011, **21**, 3508-3515.
2. T. H. Chen and W. L. Tseng, *Small*, 2012, **8**, 1912-1919.
3. W. Guo, J. Yuan and E. Wang, *Chemical Communications*, 2012, **48**, 3076-3078.
4. Y. Bao, C. Zhong, D. M. Vu, J. P. Temirov, R. B. Dyer and J. S. Martinez, *The Journal of Physical Chemistry C*, 2007, **111**, 12194-12198.
5. C.-P. Liu, T.-H. Wu, C.-Y. Liu, H.-J. Cheng and S.-Y. Lin, *Journal of Materials Chemistry B*, 2015, **3**, 191-197.
6. A. L. West, M. H. Griep, D. P. Cole and S. P. Karna, *Analytical chemistry*, 2014, **86**, 7377-7382.
7. H. Duan and S. Nie, *Journal of the American Chemical Society*, 2007, **129**, 2412-2413.
8. X. Le Guével, B. Hötzer, G. Jung, K. Hollemeyer, V. Trouillet and M. Schneider, *The Journal of Physical Chemistry C*, 2011, **115**, 10955-10963.
9. M. Shamsipur, F. Molaabasi, M. Shanehsaz and A. A. Moosavi-Movahedi, *Microchimica Acta*, 2015, **182**, 1131-1141.
10. Q. Wen, Y. Gu, L.-J. Tang, R.-Q. Yu and J.-H. Jiang, *Analytical chemistry*, 2013, **85**, 11681-11685.
11. S. Chall, S. S. Mati, I. Das, A. Kundu, G. De and K. Chattopadhyay, *Langmuir*, 2017, **33**, 12120-12129.
12. Y. Yu, X. Chen, Q. Yao, Y. Yu, N. Yan and J. Xie, *Chemistry of Materials*, 2013, **25**, 946-952.
13. J. Xie, Y. Zheng and J. Y. Ying, *Journal of the American Chemical Society*, 2009, **131**, 888-889.

14. P. L. Xavier, K. Chaudhari, P. K. Verma, S. K. Pal and T. Pradeep, *Nanoscale*, 2010, **2**, 2769-2776.
15. S. Kumar and R. Jin, *Nanoscale*, 2012, **4**, 4222-4227.
16. Y. Hua, Z.-H. Shao, A. Zhai, L.-J. Zhang, Z.-Y. Wang, G. Zhao, F. Xie, J.-Q. Liu, X. Zhao and X. Chen, *ACS nano*, 2023, **17**, 7837-7846.
17. S. Kundu, H. Yuan and R. Antoine, *The Journal of Physical Chemistry Letters*, 2025, **16**, 8480-8485.
